# Supplementary material for: Porosity effect on ZrO2 hollow shells and hydrothermal stability for catalytic steam reforming of methane
Source: Royal Society of Chemistry journal article supplement (doi:10.1039/c5ta07015e), 2015-11-06
Supplement: c5ta07015e2.pdf [file c5ta07015e2.pdf]

Electronic Supplementary Information (ESI)

**Porosity effect on ZrO<sub>2</sub> hollow shell and hydrothermal stability for catalytic steam reforming of methane**

Zi-Yian Lim,<sup>a,b</sup> Chunzheng Wu,<sup>a</sup> Wei Guo Wang,<sup>a</sup> Kwang-Leong Choy,<sup>\*c</sup> and Hongfeng Yin<sup>\*a</sup>

- a. Ningbo Institute of Material Technology and Engineering, 1219 Zhongguan West Road, Zhenhai District, Ningbo 315201, China. E-mail: [yinhf@nimte.ac.cn](mailto:yinhf@nimte.ac.cn)
- b. University of Nottingham, Ningbo China, 199 Taikang East Road, University Park, Ningbo 315100, China. E-mail: [zx08427@nottingham.edu.cn](mailto:zx08427@nottingham.edu.cn)
- c. UCL Institute for Materials Discovery, University College London, Kathleen Lonsdale Building, Gower Place, London, WC1E6BT, United Kingdom. E-mail: [k.choy@ucl.ac.uk](mailto:k.choy@ucl.ac.uk). Tel: +44(0) 207679 3855

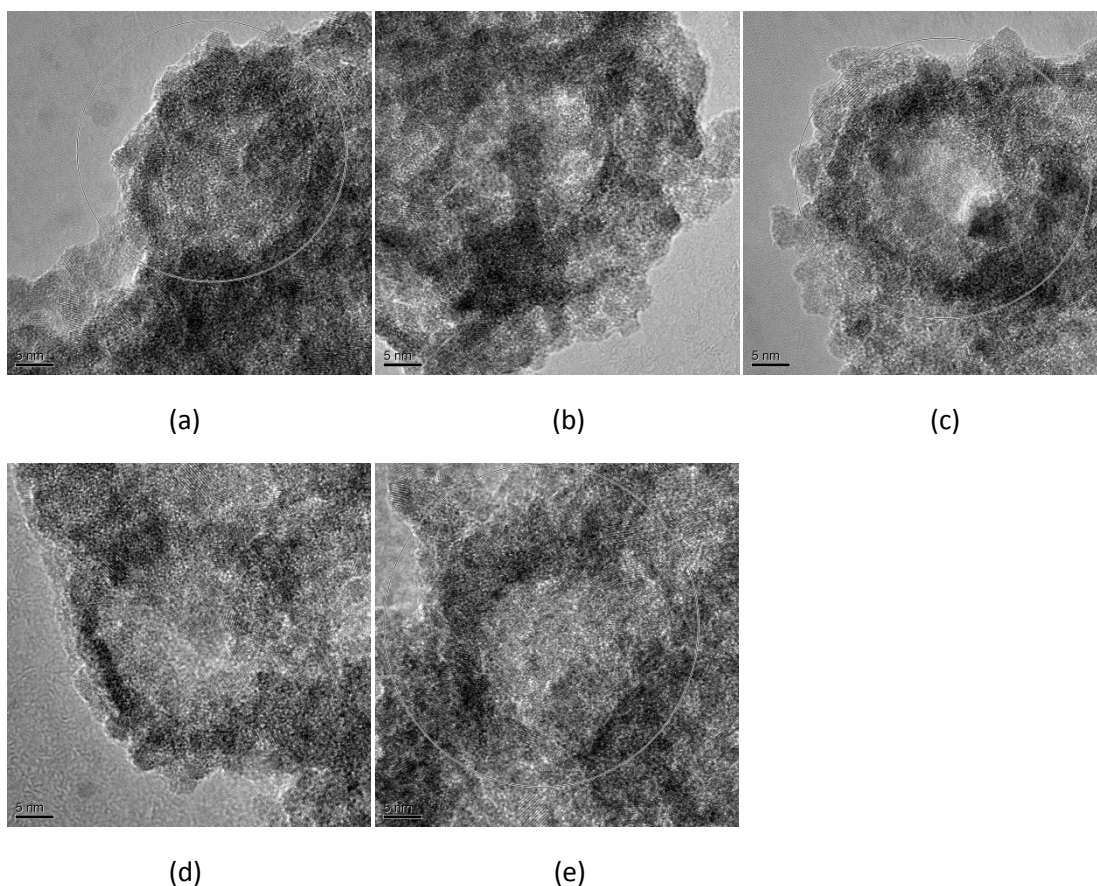

**Fig. S1** HRTEM images of BrNi-0.0 (a), BrNi-1.6 (b), BrNi-2.4 (c), BrNi-3.2 (d), and BrNi-4.8 (e) before steam reforming test.

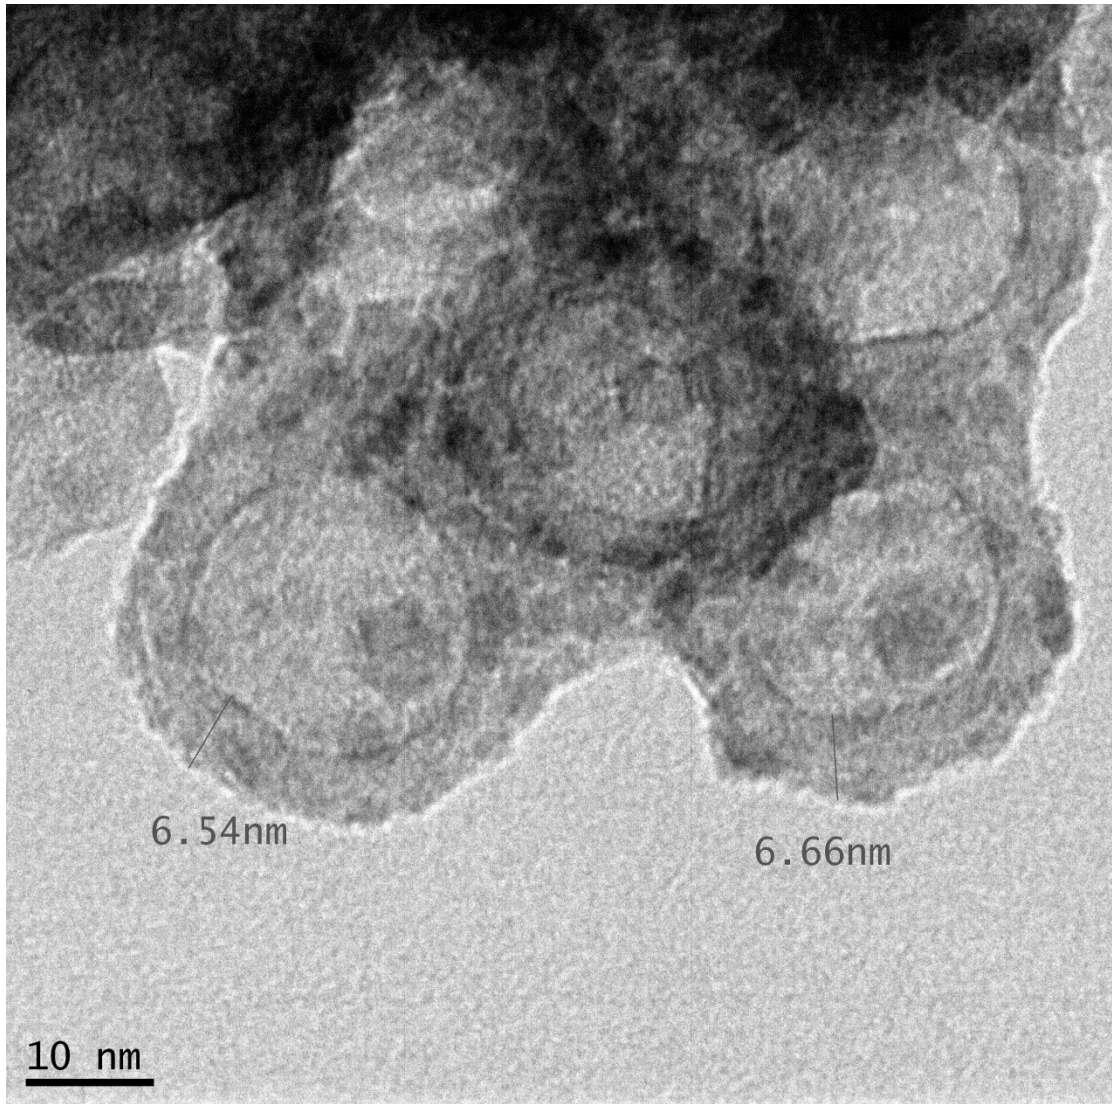

Fig. S2 TEM micrograph of Ni@SiO<sub>2</sub>@ZrO<sub>2</sub> after 750°C calcinations and to display the thickness of zirconia hollow shell.
